# Supplementary material for: Nigella sativa-Manganese Ferrite-Reduced Graphene Oxide-Based Nanomaterial: A Novel Adsorbent for Water Treatment
Source: MDPI journal article supplement (doi:10.3390/molecules28135007), 2023-06-26
Supplement: s1 [file s1]

## Electronics Supplementary Information, ESI

### Characterization and instrumentation analysis

| Analysis                   | Instrument                                                        | Company detail                                                        | Country        | Remarks                                                                                                                                                               |
|----------------------------|-------------------------------------------------------------------|-----------------------------------------------------------------------|----------------|-----------------------------------------------------------------------------------------------------------------------------------------------------------------------|
| pH of solution             | pH meter                                                          | Model number APX 175 E/C, Control dynamics instrumentation Pvt. Ltd., | India          | pH of solution was adjusted by using acidic (0.1M HCl) and/or basic (0.1M NaOH) solution                                                                              |
| Crystal phase and size     | X-ray diffractometer                                              | Ultima IV, Rigaku                                                     | United State   | Condition: 2θ range 10-80°, Cu-Kα radiation ( $\lambda = 1.54 \text{ \AA}$ ), a Cu-filter, generator voltage 35 kV, 30mA current, and a proportional counter detector |
| Functional groups          | Spectrometer                                                      | Shimadzu                                                              | Japan          | Analyzed in mid IR range, i.e., 4,000-400 $\text{cm}^{-1}$                                                                                                            |
| Surface morphology         | Scanning electron microscope                                      | Nova nano SEM 450, FEI                                                | United State   | -                                                                                                                                                                     |
| Elemental composition      | Energy-dispersive X-ray spectroscope                              | Bruker 127 eV                                                         | United State   | -                                                                                                                                                                     |
| Particle shape and size    | Transmittance electron microscope                                 | F30 S-Twin, Tecnai microscope                                         | United State   | Operated at 80 kV.                                                                                                                                                    |
| Thermal analysis           | UV—Vis spectrophotometer                                          | Perkin Elmer Pyris 6 T80-UV/VIS, PG instruments Ltd                   | United Kingdom | -                                                                                                                                                                     |
| Absorbance                 | UV—Vis spectrophotometer                                          | T80-UV/VIS, PG instruments Ltd                                        | United Kingdom | -                                                                                                                                                                     |
| Surface area and pore size | Surface area and pore size analyzer (Measurement by Gas Sorption) | Autosorb iQ-MP/XR (Quantachrome)                                      | United State   | -                                                                                                                                                                     |
| Zeta potential             | Zeta Potential Analyzer                                           | Malvern Panalytical Ltd                                               | United Kingdom | At 25 °C with count rate 138.8                                                                                                                                        |

### Zero-point charge determination of NHC

The zero-point charge of the NHC was measured by the salt addition method as shown by the flow chart below.

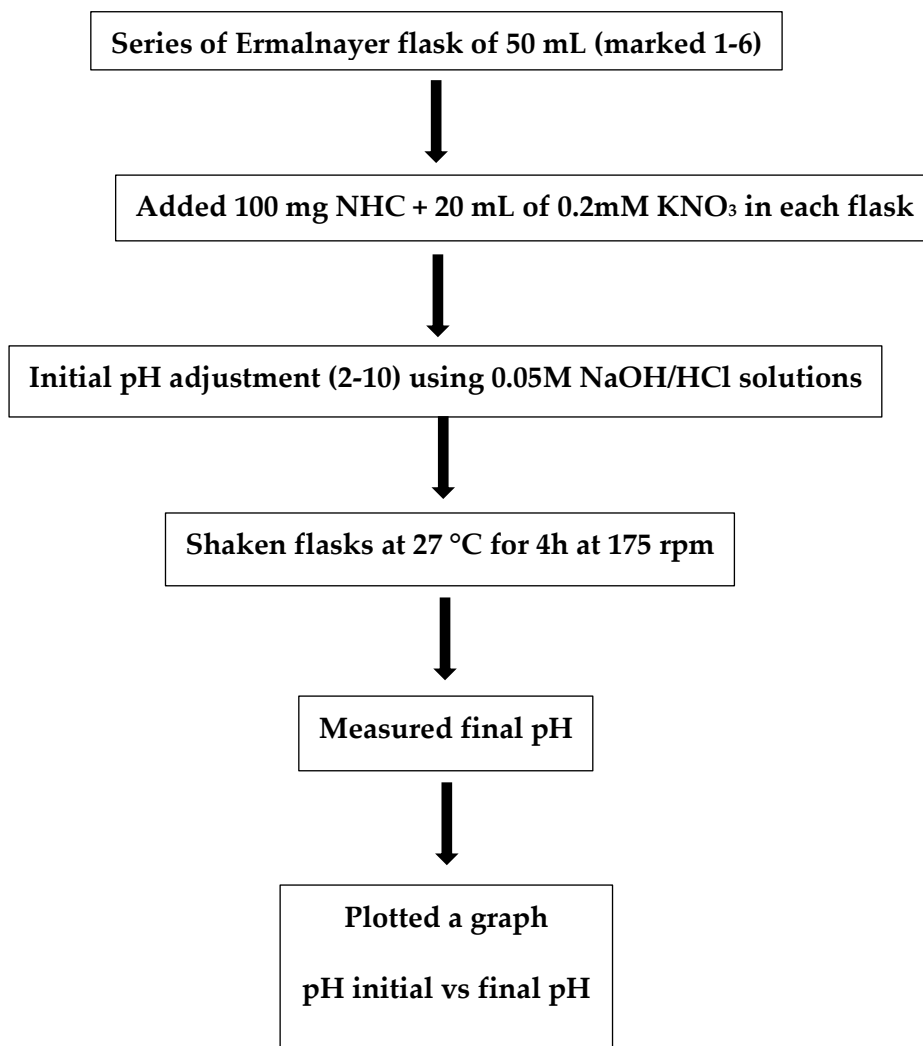

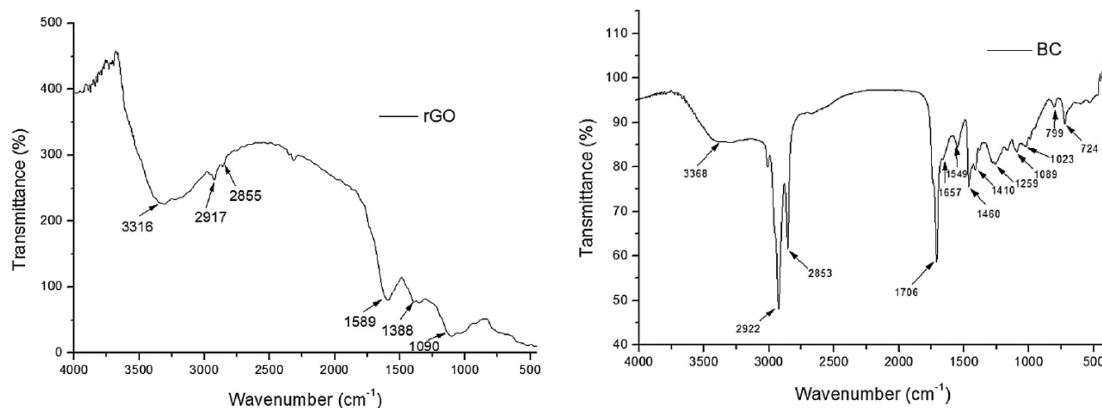

**Figure S1.** FTIR spectra of reduced graphene oxide, rGO (Reprinted with permission from Tara et al [29], copyright (2021) Elsevier (License No. 5566540972617) and black cumin seeds, BC (Reprinted with permission from Tara et al [29], copyright (2021) Elsevier (License No. 5566540972617)).

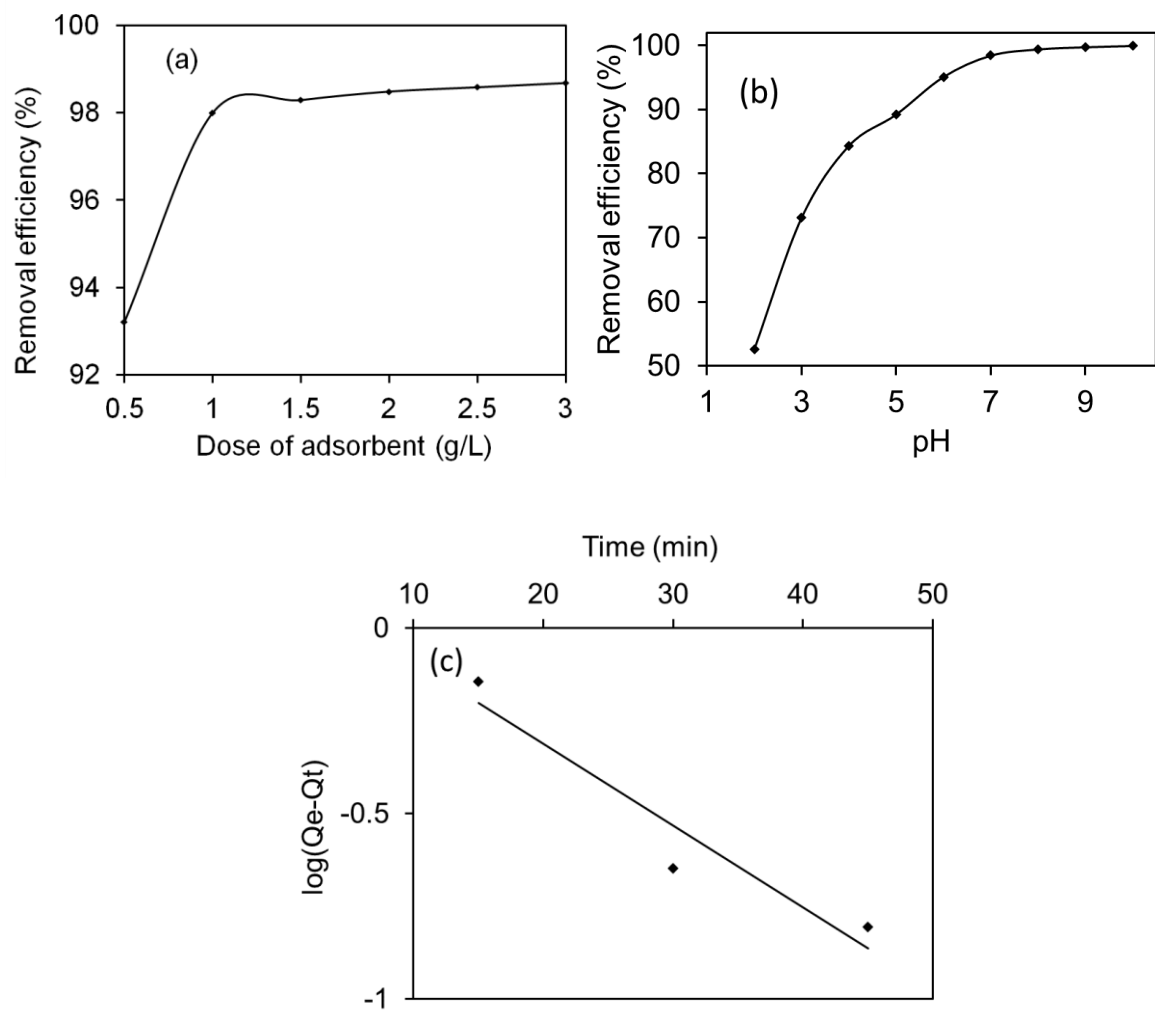

**Figure S2.** Results of (a) adsorbent dose effect, (b) pH effect, (c) pseudo first order kinetic for MB adsorption on to the Mn-Fe<sub>2</sub>O<sub>4</sub>/ rGO-BC NHC.

**Table S1.** Results of thermodynamic parameters at various temperatures

| Temperature<br>(K) | $\Delta G$<br>(KJ/mol) | $\Delta H$ (KJ/mol) | $\Delta S$<br>(KJ/mol/K) |
|--------------------|------------------------|---------------------|--------------------------|
| 300                | -10.673                | +37.687             | +0.161                   |
| 308                | -11.962                |                     |                          |
| 318                | -13.574                |                     |                          |
